# Supplementary material for: Small practical cluster models for perovskites based on the similarity criterion of central location environment and their applications
Source: Royal Society of Chemistry journal article supplement (doi:10.1039/d2cp00562j), 2022-01-01
Supplement: d2cp00562j1.pdf [file d2cp00562j1.pdf]

## **Supplementary Information for:**

### **Small Practical Cluster Models for Perovskites Based on the Similarity Criterion of Central Location Environment and Their Applications**

Yan Chen, Xunlei Ding,<sup>\*</sup> Luona Yang, Yaya Wang, Joseph Israel Gurti, Mengmeng Wang, Wei Li, Xin Wang  
and Weijie Yang<sup>\*</sup>

<sup>\*</sup>Authors to whom correspondence should be addressed.

Emails: dingxl@ncepu.edu.cn; yangwj@ncepu.edu.cn

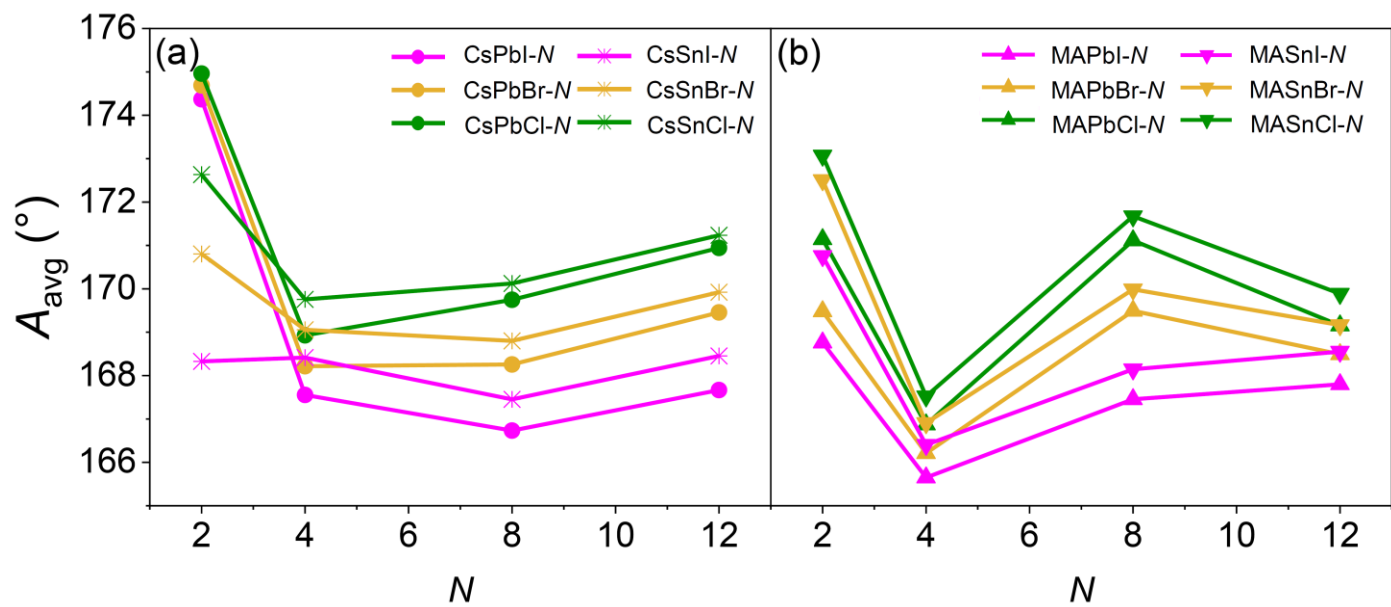

Fig. S1. The average angle of B-X<sub>b</sub>-B ( $A_{\text{avg}}$ , °) in (a) CsBX- $N$  and (b) MABX- $N$  (B = Pb and Sn; X = Cl, Br, and I;  $N = 2, 4, 8,$  and  $12$ ).

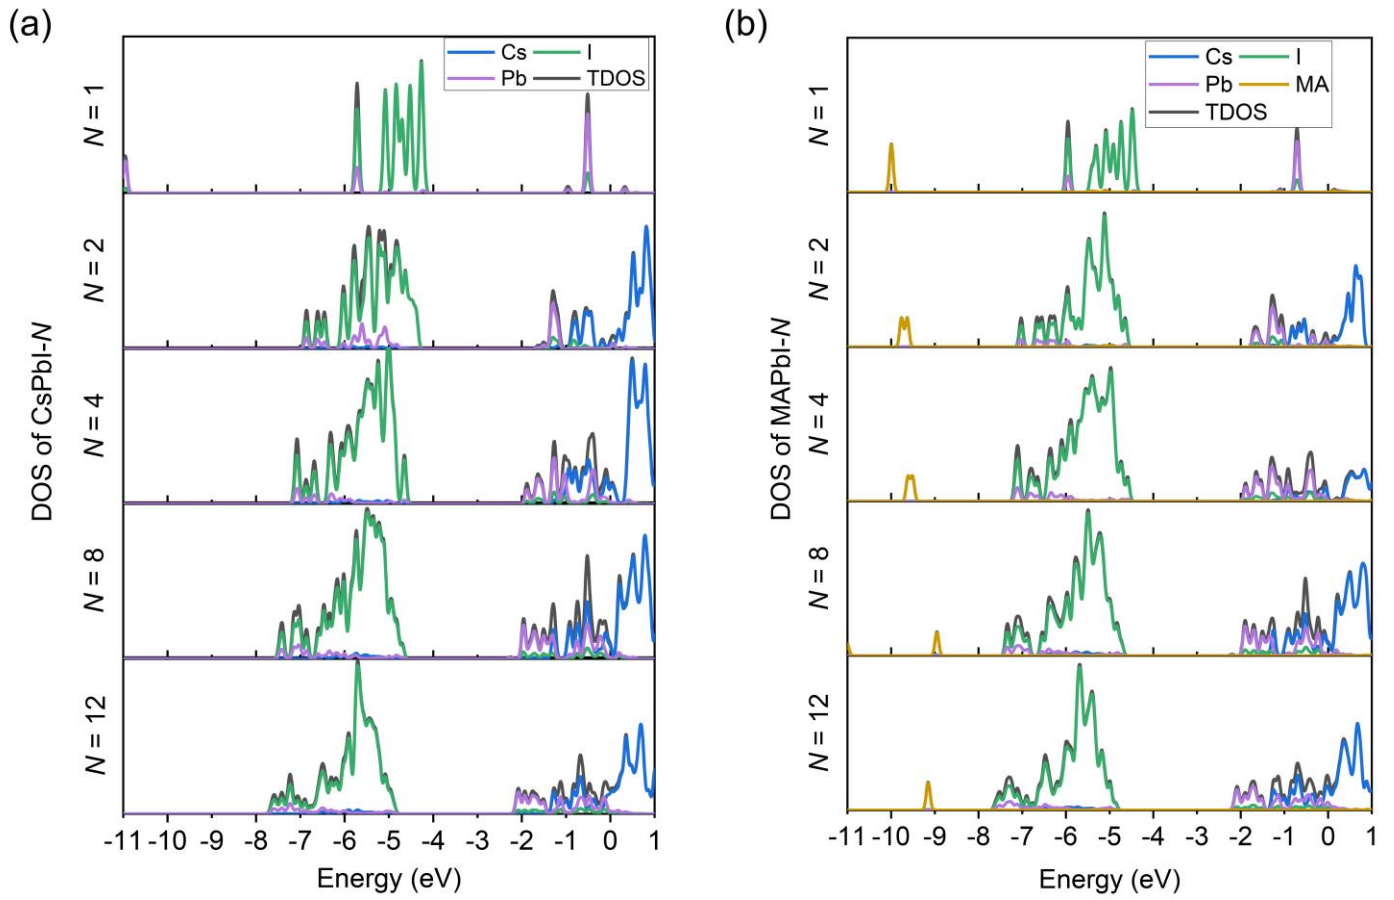

Fig. S2. The partial density of states (PDOS) and total density of states (TDOS) of CsBX- $N$  and MABX- $N$  ( $N = 1, 2, 4, 8,$  and  $12$ ). The full width at half maximum is set as  $0.1$  eV.

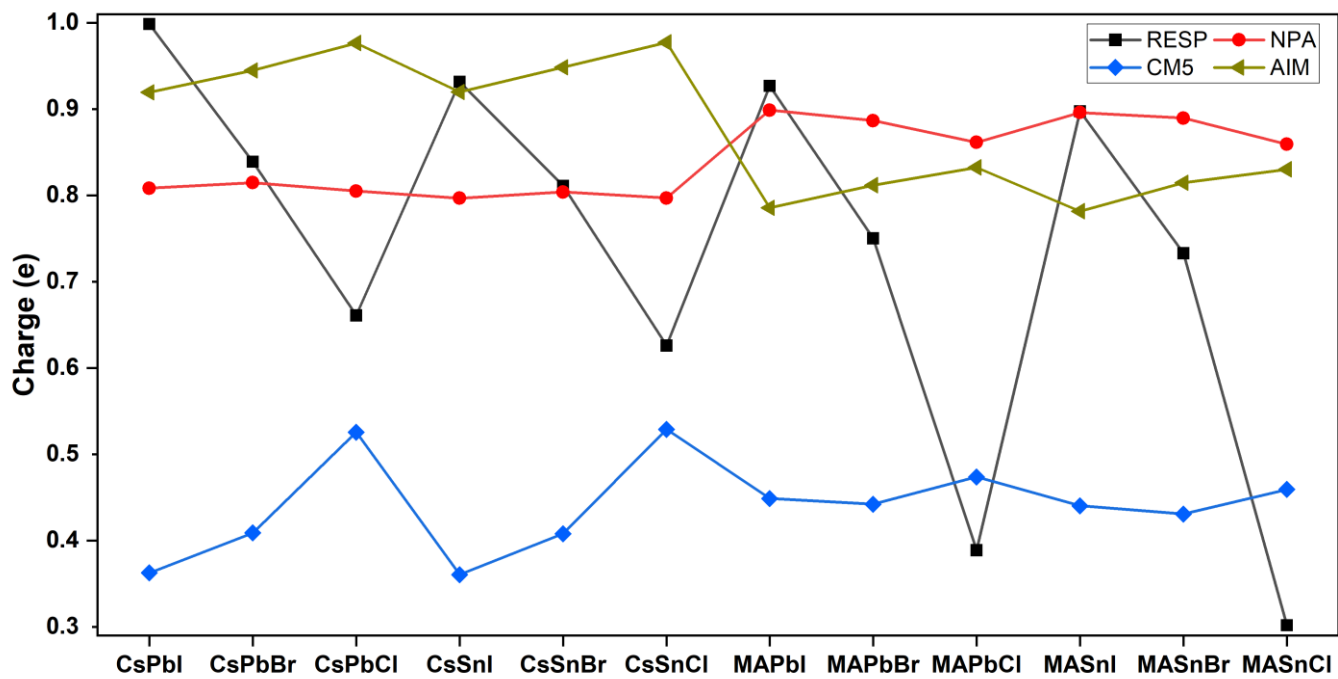

Fig. S3. The average charge on each central A sites of ABX-12 systems (A = Cs and MA; B = Pb and Sn; X = I, Br, and Cl) with different calculated methods.

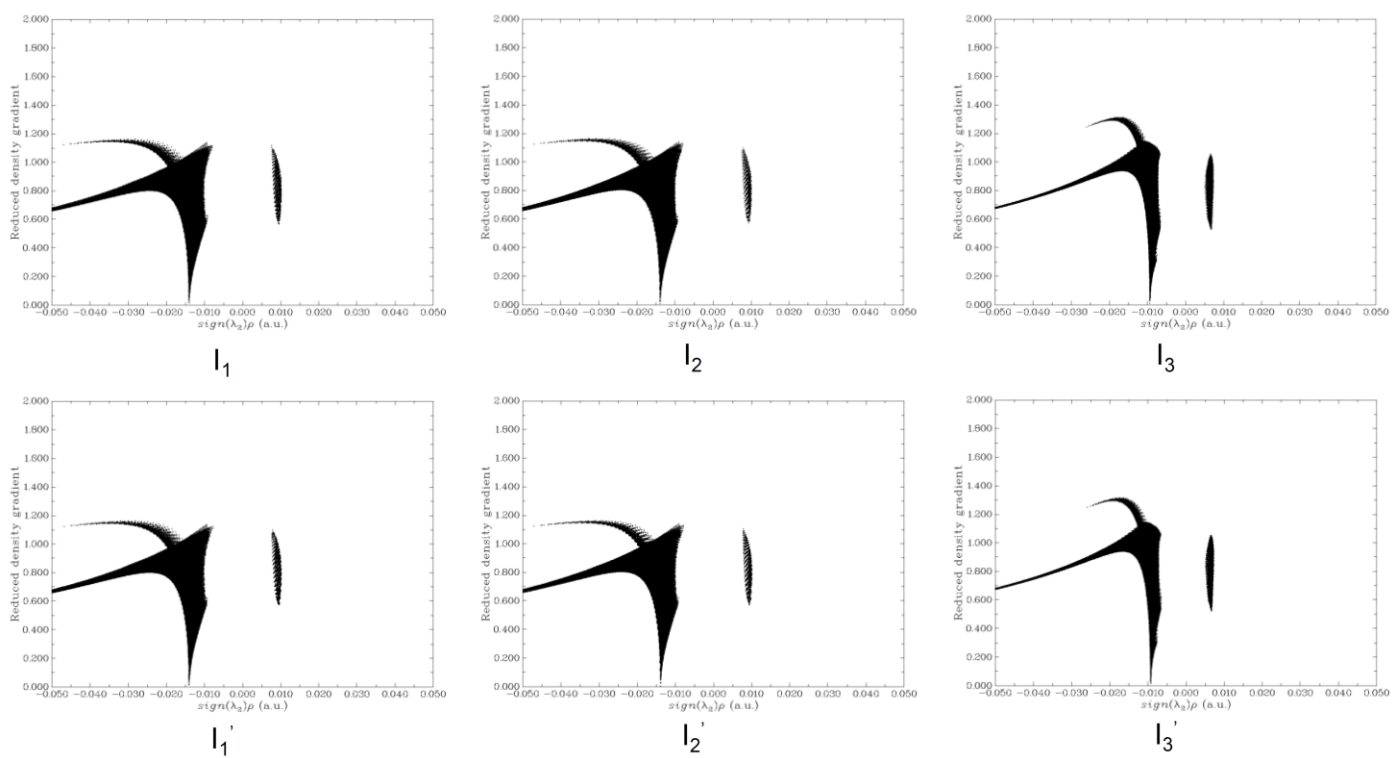

Fig. S4. The specific RDG analyses between each pair of (N)H-X atoms for MAPbI-12.  $I_n$  and  $I_n'$  correspond to  $I_n$  in Figure 8 since the position of them are the same.

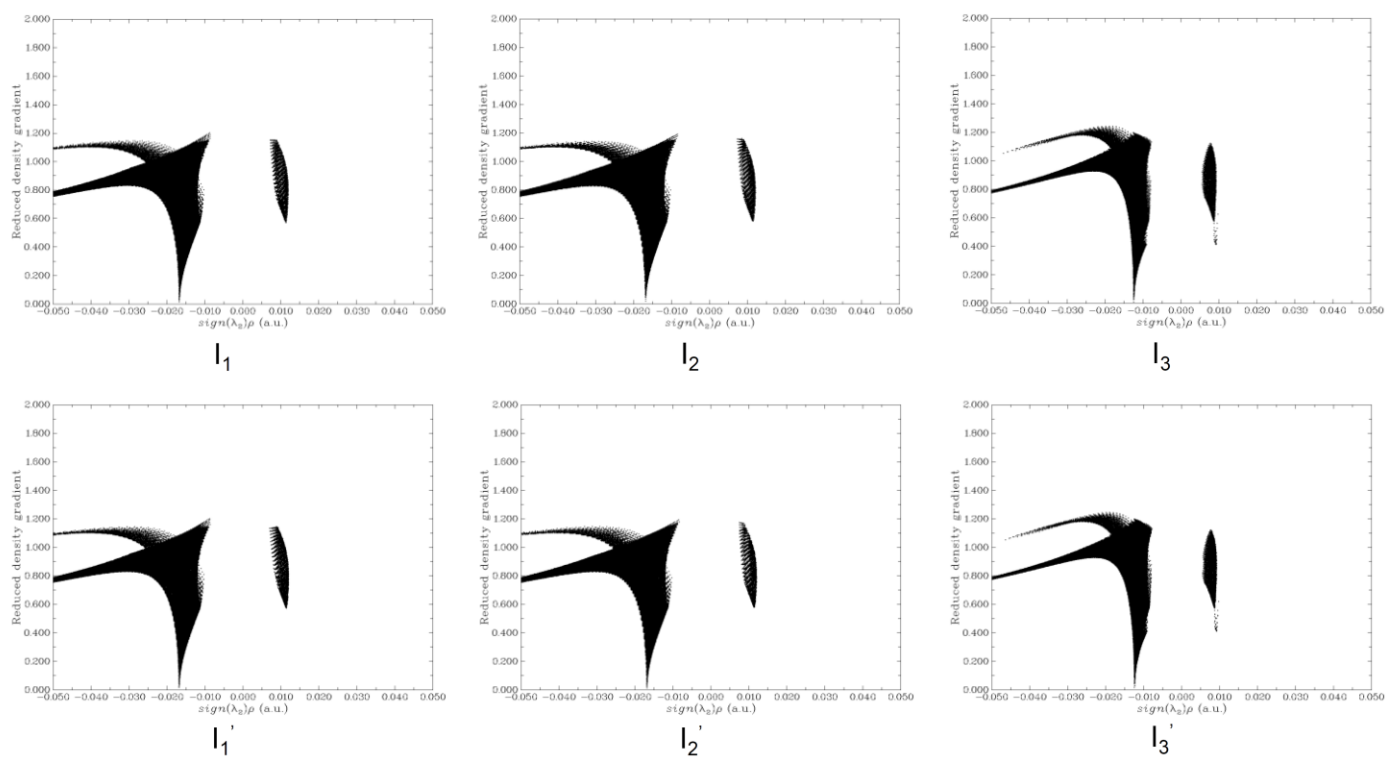

Fig. S5. The specific RDG analyses between each pair of (N)H-X atoms for MAPbBr-12.  $I_n$  and  $I_n'$  correspond to  $I_n$  in Figure 8 since the position of them are the same.

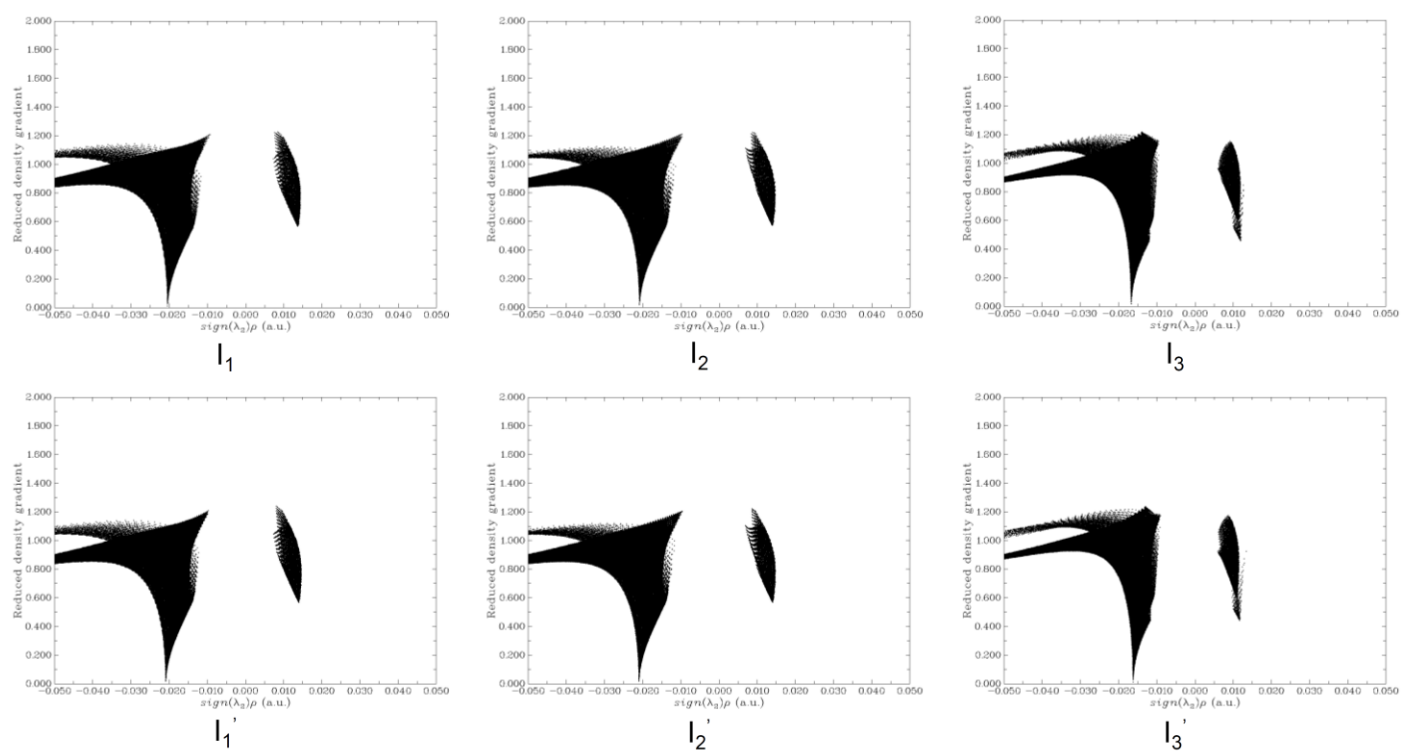

Fig. S6. The specific RDG analyses between each pair of (N)H-X atoms for MAPbCl-12.  $I_n$  and  $I_n'$  correspond to  $I_n$  in Figure 8 since the position of them are the same.

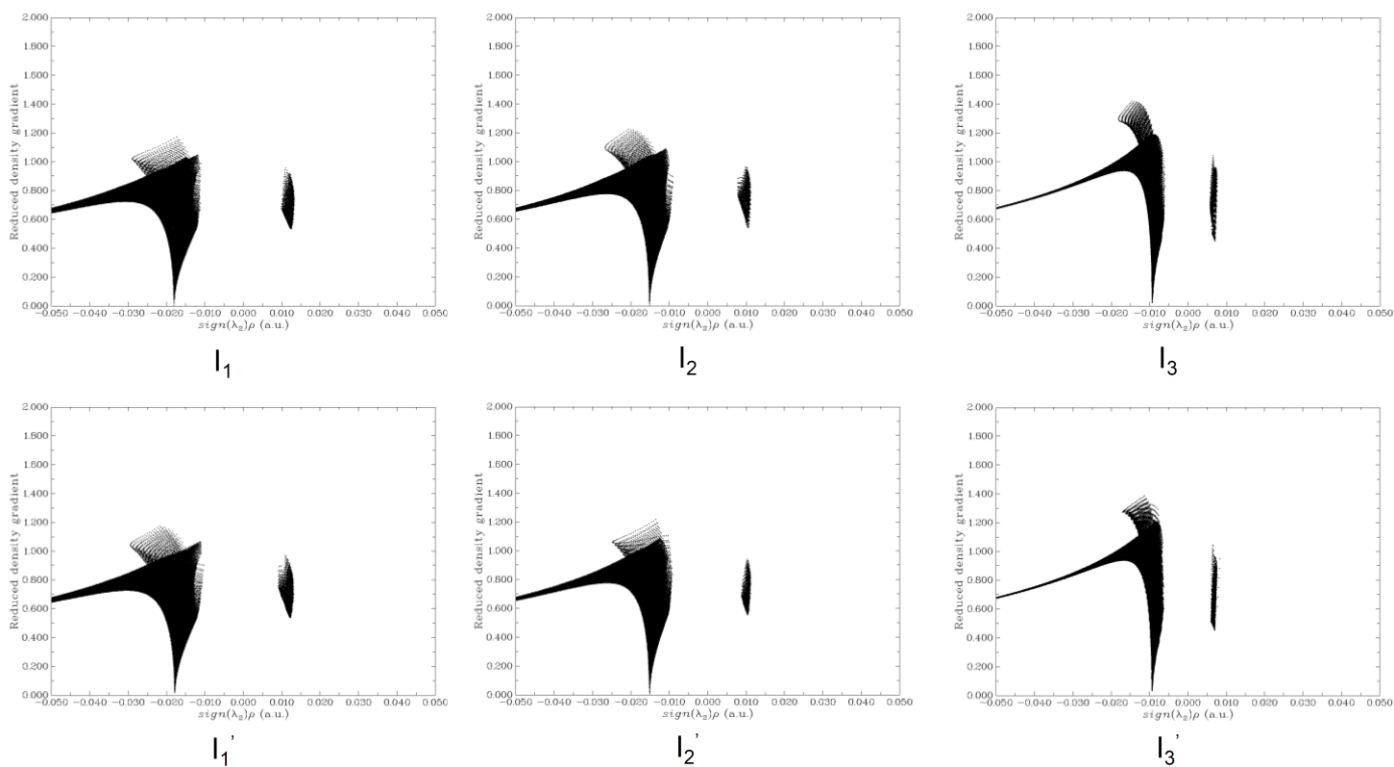

Fig. S7. The specific RDG analyses between each pair of (N)H-X atoms for EAPbI-12.  $I_n$  and  $I_n'$  correspond to  $I_n$  in Figure 8 since the position of them are the same.



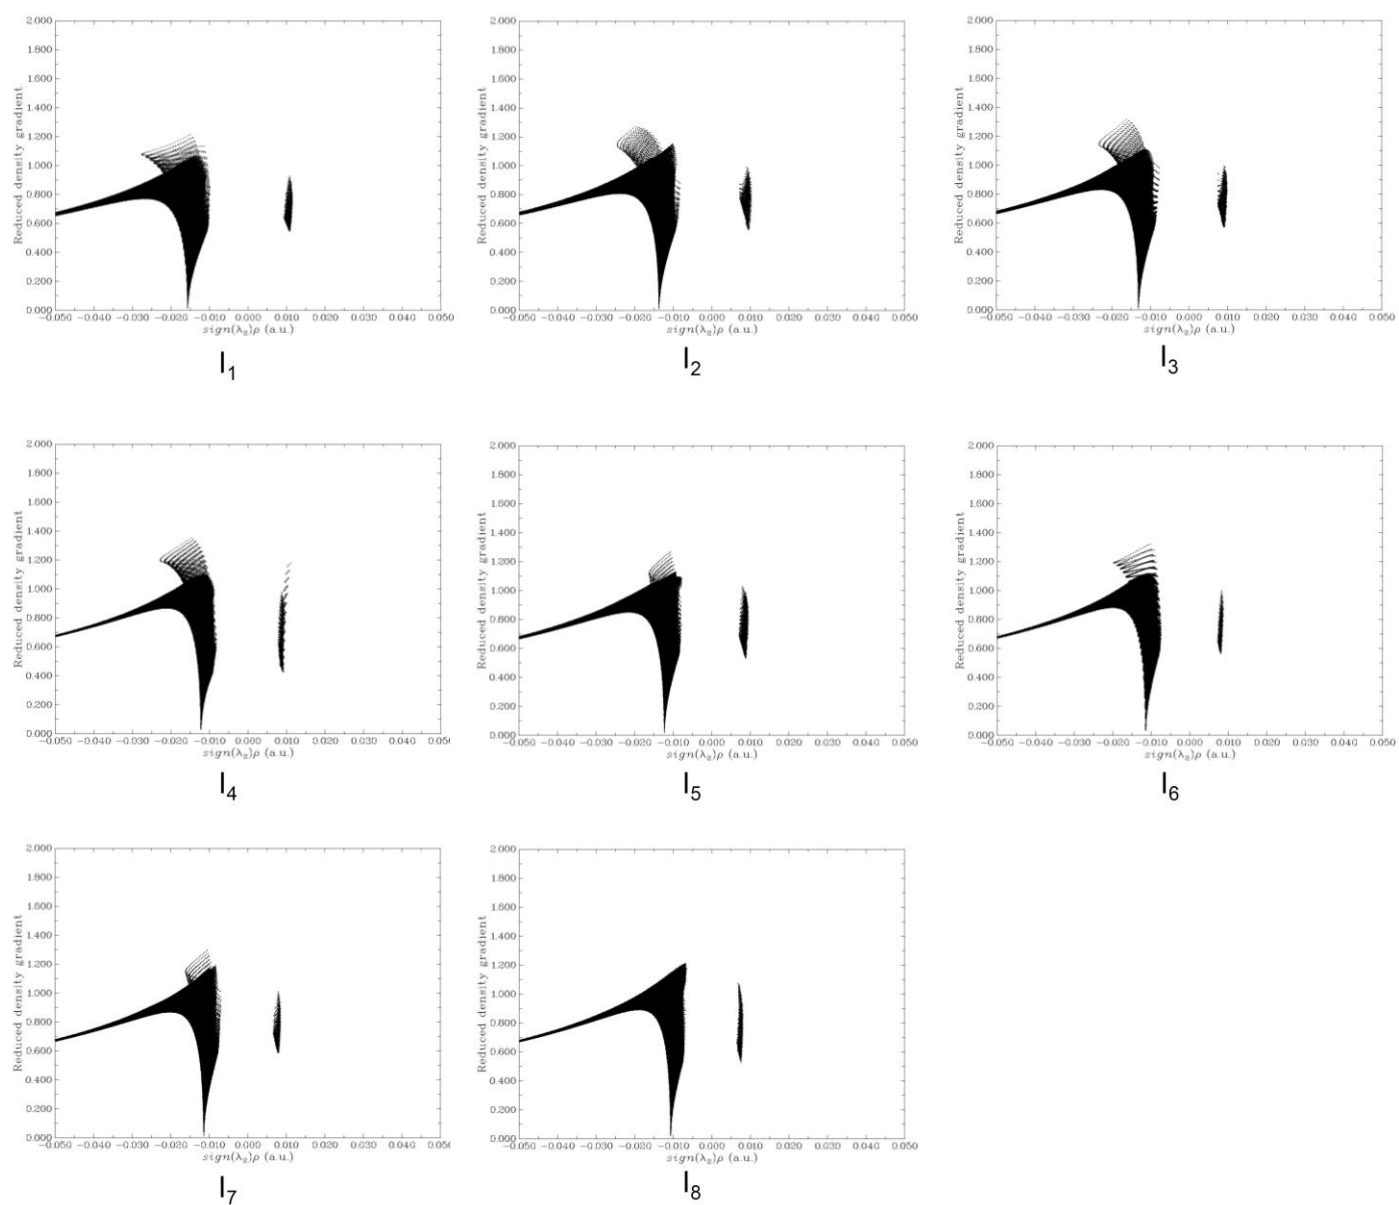

Fig. S8. The specific RDG analyses between each pair of (N)H-X atoms for FAPbI-12.

Table S1. The binding energies  $\Delta E_1$ ,  $\Delta E_1'$ ,  $\Delta E_2$ , and  $\Delta E_2'$  (in eV) between A and BX part in ABX-12 (A = Cs and MA; B = Pb and Sn; X = Cl, Br, and I) calculated by equations (1), (2), (3), and (4), respectively.

|           | $\Delta E_1$ | $\Delta E_1'$ | $\Delta E_2$ | $\Delta E_2'$ |           | $\Delta E_1$ | $\Delta E_1'$ | $\Delta E_2$ | $\Delta E_2'$ |
|-----------|--------------|---------------|--------------|---------------|-----------|--------------|---------------|--------------|---------------|
| CsSnI-12  | 5.27         | 5.64          | 5.26         | 6.40          | MASnI-12  | 5.44         | 5.74          | 5.41         | 6.58          |
| CsSnBr-12 | 5.26         | 5.93          | 5.23         | 6.72          | MASnBr-12 | 5.38         | 6.06          | 5.32         | 6.84          |
| CsSnCl-12 | 5.23         | 6.26          | 5.19         | 7.09          | MASnCl-12 | 5.26         | 6.31          | 5.19         | 7.12          |
| CsPbI-12  | 5.80         | 5.66          | 5.80         | 6.40          | MAPbI-12  | 5.97         | 5.87          | 5.96         | 6.59          |
| CsPbBr-12 | 5.84         | 5.94          | 5.83         | 6.71          | MAPbBr-12 | 5.98         | 6.09          | 5.95         | 6.86          |
| CsPbCl-12 | 5.87         | 6.25          | 5.87         | 7.07          | MAPbCl-12 | 5.95         | 6.33          | 5.91         | 7.14          |

Table S2. Frequencies of main vibrational modes ( $\text{cm}^{-1}$ ) of organic cations for both isolated ones and those in cage structures.

|                                          | MA           | MAPbI-12                     | MAPbBr-12                    | MAPbCl-12                    | EA                   | EAPbI-12                     | FA           | FAPbI-12                     |
|------------------------------------------|--------------|------------------------------|------------------------------|------------------------------|----------------------|------------------------------|--------------|------------------------------|
| C-N stretch                              | 916          | 973<br>973                   | 984<br>985                   | 997<br>998                   | 804                  | 864<br>871                   | 1101<br>1382 | 1102<br>1117<br>1379<br>1385 |
| C-C stretch                              |              |                              |                              |                              | 1014                 | 1063                         |              |                              |
| Symmetric C-H stretch ( $\text{CH}_3$ )  | 3043         | 3032<br>3033                 | 3038<br>3039                 | 3045<br>3046                 | 2998                 | 3000<br>3001                 |              |                              |
| Symmetric C-H stretch ( $\text{CH}_2$ )  |              |                              |                              |                              | 3050                 | 3047<br>3048                 |              |                              |
| C-H stretch ( $\text{CH}$ )              |              |                              |                              |                              |                      |                              | 3190         | 3162<br>3185                 |
| Asymmetric C-H stretch ( $\text{CH}_3$ ) | 3168<br>3168 | 3147<br>3147<br>3163<br>3163 | 3153<br>3153<br>3167<br>3168 | 3159<br>3160<br>3174<br>3175 | 3090<br>3107<br>3128 | 3093<br>3094<br>3124<br>3125 |              |                              |
| Asymmetric C-H stretch ( $\text{CH}_2$ ) |              |                              |                              |                              |                      | 3127<br>3129                 |              |                              |
| Symmetric N-H stretch ( $\text{NH}_3$ )  | 3321         | 3194<br>3194                 | 3200<br>3201                 | 3198<br>3202                 | 3316                 | 3170<br>3174                 |              |                              |
| Asymmetric N-H stretch ( $\text{NH}_3$ ) | 3427<br>3432 | 3253<br>3254<br>3357<br>3358 | 3259<br>3260<br>3351<br>3351 | 3254<br>3259<br>3338<br>3347 | 3429<br>3433         | 3232<br>3237<br>3348<br>3350 |              |                              |
| Symmetric N-H stretch ( $\text{NH}_2$ )  |              |                              |                              |                              |                      |                              | 3491<br>3505 | 3362<br>3398<br>3400<br>3426 |
| Asymmetric N-H stretch ( $\text{NH}_2$ ) |              |                              |                              |                              |                      |                              | 3624<br>3625 | 3495<br>3534<br>3536<br>3547 |
